# Supplementary material for: Intratumoral IFN-γ or topical TLR7 agonist promotes infiltration of melanoma metastases by T lymphocytes expanded in the blood after cancer vaccine
Source: PubMed Central journal article supplement — J Immunother Cancer. 2023 Feb 6;11(2):e005952. doi: 10.1136/jitc-2022-005952 (PMC9906378; doi:10.1136/jitc-2022-005952), 2023-02-06
Supplement: jitc-2022-005952supp001.pdf [file jitc-2022-005952supp001.pdf]

**Supplemental Table 1 – 12MP [21]**

| Allele     | Sequence     | Epitope             |
|------------|--------------|---------------------|
| HLA-A1     | DAEKSDICTDEY | Tyrosinase 240-251* |
|            | SSDYVIPIGTY  | Tyrosinase 146-156  |
|            | EADPTGHSY    | MAGE-A1 161-169     |
|            | EVDPIGHLY    | MAGE-A3 168-176     |
| HLA-A2     | YMDGTMSQV    | Tyrosinase 369-377• |
|            | IMDQVPFSV    | gp100 209-217#      |
|            | YLEPGPVTA    | gp100 280-288       |
|            | GLYDGMEHL    | MAGE-A10 254-262    |
| HLA-A3     | ALLAVGATK    | gp100 17-25         |
|            | LIYRRRLMK    | gp100 614-622       |
| HLA-A3/A11 | ASGPGGGAPR   | NY-ESO-1 53-62      |
|            | SLFRAVITK    | MAGE-A1 96-104      |

\* Substitution of S for C at residue 244

• Post-translational change of N to D at residue 371

# 209-2M, substitution of M for T at residue 210
