# Supplementary material for: Intratumoral IFN-γ or topical TLR7 agonist promotes infiltration of melanoma metastases by T lymphocytes expanded in the blood after cancer vaccine
Source: PubMed Central journal article supplement — J Immunother Cancer. 2023 Feb 6;11(2):e005952. doi: 10.1136/jitc-2022-005952 (PMC9906378; doi:10.1136/jitc-2022-005952), 2023-02-06
Supplement: jitc-2022-005952supp002.pdf [file jitc-2022-005952supp002.pdf]

**Supplemental Table 2 – Number of new vs. significantly increased viCLs clonotypes**

| <b>Clinical Trial</b> | <b>Patient</b> | <b>Number of viCLs Clonotypes</b> | <b>Number of New viCLs Clonotypes</b> | <b>Number of Significantly Increased viCLs Clonotypes (p &lt; 0.05)</b> |
|-----------------------|----------------|-----------------------------------|---------------------------------------|-------------------------------------------------------------------------|
| Mel51                 | 1              | 111                               | 89                                    | 22                                                                      |
|                       | 2              | 29                                | 16                                    | 13                                                                      |
|                       | 3              | 85                                | 66                                    | 19                                                                      |
|                       | 4              | 47                                | 37                                    | 10                                                                      |
| Mel53                 | 5              | 7                                 | 3                                     | 4                                                                       |
|                       | 6              | 82                                | 71                                    | 11                                                                      |
