# Supplementary material for: Intratumoral IFN-γ or topical TLR7 agonist promotes infiltration of melanoma metastases by T lymphocytes expanded in the blood after cancer vaccine
Source: PubMed Central journal article supplement — J Immunother Cancer. 2023 Feb 6;11(2):e005952. doi: 10.1136/jitc-2022-005952 (PMC9906378; doi:10.1136/jitc-2022-005952), 2023-02-06
Supplement: jitc-2022-005952supp003.pdf [file jitc-2022-005952supp003.pdf]

**Supplemental Table 3 – Total productive rearrangements, total productive templates, productive Simpson clonality, and fraction of T cells of all nucleated cells, in PBMC**

| Clinical Trial | Patient | Week of PBMC Sample | Total Productive Rearrangements | Total Productive Templates | Productive Simpson Clonality | Fraction of T Cells of Nucleated Cells |
|----------------|---------|---------------------|---------------------------------|----------------------------|------------------------------|----------------------------------------|
| Mel51          | 1       | 0                   | 36,733                          | 47,405                     | 0.0160                       | 0.195                                  |
|                |         | 7                   | 35,264                          | 51,476                     | 0.0160                       | 0.221                                  |
|                | 2       | 0                   | 62,740                          | 78,221                     | 0.0159                       | 0.396                                  |
|                |         | 13                  | 76,998                          | 99,329                     | 0.0149                       | 0.505                                  |
|                | 3       | 0                   | 54,363                          | 86,573                     | 0.0502                       | 0.384                                  |
|                |         | 3                   | 48,678                          | 81,224                     | 0.0449                       | 0.361                                  |
|                | 4       | 0                   | 42,320                          | 78,417                     | 0.0121                       | 0.327                                  |
|                |         | 3                   | 39,692                          | 68,378                     | 0.0264                       | 0.311                                  |
| Mel53          | 5       | 0                   | 44,417                          | 76,329                     | 0.1781                       | 0.490                                  |
|                |         | 3                   | 62,231                          | 112,189                    | 0.1881                       | 0.494                                  |
|                | 6       | 0                   | 48,908                          | 53,388                     | 0.0065                       | 0.377                                  |
|                |         | 3                   | 70,287                          | 81,932                     | 0.0085                       | 0.380                                  |
