# Supplementary material for: Intratumoral IFN-γ or topical TLR7 agonist promotes infiltration of melanoma metastases by T lymphocytes expanded in the blood after cancer vaccine
Source: PubMed Central journal article supplement — J Immunother Cancer. 2023 Feb 6;11(2):e005952. doi: 10.1136/jitc-2022-005952 (PMC9906378; doi:10.1136/jitc-2022-005952), 2023-02-06
Supplement: jitc-2022-005952supp004.pdf [file jitc-2022-005952supp004.pdf]

**Supplemental Table 4 – Number of T cells per excluded clonotype (per 100,000 cells) by treatment day in Mel51**

| Patient | TCR Sequence                                                                                | Day 1    | Day 22   | Day 24 (-IFN $\gamma$ ) | Day 24 (+IFN $\gamma$ ) |
|---------|---------------------------------------------------------------------------------------------|----------|----------|-------------------------|-------------------------|
| 2       | ACCTTGAGCTGGGGGACTCGGCCCTTATCTTTGCGCCAGCAGC<br>TTGGAGGGACAGGGAGGGACCTATGGCTACACCTTCGGTTCG   | 229.358  | 0.0      | 58.411                  | 200.424                 |
| 3       | GAGTCGCCCAGCCCCAACCCAGACCTCTCTGTACTTCTGTGCCAGC<br>AGTCCCATCTCGGGACAGAATGAAAACTGTTTTTGGCAGT  | 3557.312 | 6665.382 | -                       | 5341.235                |
|         | GAGTCCGCCAGCACCAACCAGACATCTATGTACCTCTGTGCCAGC<br>AGTTCCGACTCCCCAGGCGGGAATGAGCAGTTCTTCGGGCCA | 263.505  | 154.1113 | -                       | 45.297                  |
|         | CGCACAGAGCAGGGGGACTCGGCCATGTATCTCTGTGCCAGCAG<br>CTCTCGGGACAGGGGTTCTGGAAACACCATATATTTGGAGAG  | 131.752  | 192.641  | -                       | 113.242                 |
| 4       | CTACACGCCCTGCAGCCAGAAGACTCAGCCCTGTATCTCTGCGCC<br>AGCAGCCAAGAAGGGGACGGAGAGACCCAGTACTTCGGGCCA | 3703.700 | 2857.100 | -                       | 1754.400                |
|         | AACGCCTTGTTGCTGGGGGACTCGGCCCTCTATCTCTGTGCCAGC<br>AGCAGTTTAAGAGCGGGGGCTACGAGCAGTACTTCGGGCCG  | 3703.700 | 1428.600 | -                       | 0.000                   |
|         | NNNNNNNTGTCGGCTGCTCCCTCCAAACATCTGTGTACTTCTGT<br>GCCAGCAGTTACTTACAGGGGGCTGAAGCTTCTTTGGACAA   | 3703.700 | 0.000    | -                       | 0.000                   |

- No evaluable tumor samples.
