# Supplementary material for: Intratumoral IFN-γ or topical TLR7 agonist promotes infiltration of melanoma metastases by T lymphocytes expanded in the blood after cancer vaccine
Source: PubMed Central journal article supplement — J Immunother Cancer. 2023 Feb 6;11(2):e005952. doi: 10.1136/jitc-2022-005952 (PMC9906378; doi:10.1136/jitc-2022-005952), 2023-02-06
Supplement: jitc-2022-005952supp005.pdf [file jitc-2022-005952supp005.pdf]

**Supplemental Table 5 – Number of T cells per excluded clonotype (per 100,000 cells) by treatment day in Mel53**

| Patient | TCR Sequence                                                                                | Day 1   | Day 22 (-Imiquimod) | Day 22 (+Imiquimod) | Day 43   |
|---------|---------------------------------------------------------------------------------------------|---------|---------------------|---------------------|----------|
| 6       | ATCAATTCCTGGAGCTTGGTGACTCTGCTGTGTATTCTGTGCCAGCAG<br>CCTCACGGTAACTAATGAAAACTGTTTTTGGCAGT     | 290.360 | 0.0                 | 123.365             | 236.593  |
|         | ACCCTGCAGCCAGAAGACTCGGCCCTGTATCTGTGCCAGCAGCCAAG<br>ATTCGGGACAGGGGGGCACTGAAGCTTCTTTGGACAA    | 174.216 | 0.0                 | 257.697             | 236.593  |
|         | TCCCTGGAGCTTGGTGACTCTGCTGTGTATTCTGTGCCAGCAGCCGCCT<br>ATCCAGATCCAATCTAGGAGGCTACACCTTCGGTTCTG | 406.504 | 0.0                 | 227.541             | 157.729  |
|         | NNNNTGTCGGCTGCTCCCTCCCAGACATCTGTGTACTTCTGTGCCAGCA<br>GTGGGCGGGCCGATTACAATGAGCAGTTCTTCGGGCCA | 174.216 | 0.0                 | 189.160             | 78.864   |
|         | NNNNNNNNNTGTCGGCTGCTCCCTCCCAAACATCTGTGTACTTCTGT<br>GCCAGCAGCACCTCCAATCAGCCCCAGCATTTTGGTGAT  | 58.072  | 0.0                 | 49.346              | 78.864   |
|         | GCGTCTGCTGTACCCTCTCAGACATCTGTGTACTTCTGTGCCAGCAGTGA<br>GTCAGGGGGTGGCAATCAGCCCCAGCATTTTGGTGAT | 348.432 | 0.0                 | 3692.738            | 1025.237 |
|         | ATCCGCTCACCAGGCCTGGGGGACGAGCCATGTACCTGTGTGCCACCA<br>GCATGAAGGGCGAGAATTCACCCCTCACTTTGGGAAC   | 58.072  | 0.0                 | 30.156              | 78.864   |
|         | NNNNNNNTGTCGGCTGCTCCCTCCCAGACATCTGTGTACTTCTGTGCCA<br>GCACCTTAGATCGGAACACTGAAGCTTCTTTGGACAA  | 58.072  | 0.0                 | 41.122              | 0.0      |
|         | GCCCATCCTGAAGACAGCAGCTTCTACATCTGCAGTGCTAGAGCTCAGG<br>AAGGTTCTGAACCTACAATGAGCAGTTCTTCGGGCCA  | 58.072  | 0.0                 | 38.380              | 0.0      |
