# Supplementary material for: Intratumoral IFN-γ or topical TLR7 agonist promotes infiltration of melanoma metastases by T lymphocytes expanded in the blood after cancer vaccine
Source: PubMed Central journal article supplement — J Immunother Cancer. 2023 Feb 6;11(2):e005952. doi: 10.1136/jitc-2022-005952 (PMC9906378; doi:10.1136/jitc-2022-005952), 2023-02-06
Supplement: jitc-2022-005952supp006.pdf [file jitc-2022-005952supp006.pdf]

Supplemental Table 6 – Number of T cells per clonotype (per 100,000 cells) by treatment day in Mel51

| Patient | TCR Sequence                                                                                | Day 1 | Day 22 | Day 24 (-IFN $\gamma$ ) | Day 24 (+IFN $\gamma$ ) |
|---------|---------------------------------------------------------------------------------------------|-------|--------|-------------------------|-------------------------|
| 1       | TTGGCGTCTGCTGTACCCTCTCAGACATCTGTGTACTTCTGTGCCAGCAGTGATC<br>TGAGACAGGGTGGAGGCTACACCTTCGGTTCG | 0.0   | 0.0    | -                       | 1.171                   |
|         | TCTGCTGTACCCTCTCAGACATCTGTGTACTTCTGTGCCAGCAGTGACTCTCGCC<br>AGGGGCTCAATTCACCCCTCCACTTTGGGAAC | 0.0   | 0.0    | -                       | 1.757                   |
|         | TCTGCTGTACCCTCTCAGACATCTGTGTACTTCTGTGCCAGCAGTGACTCGAGAC<br>AGGGGTAAATTCACCCCTCCACTTTGGGAAC  | 0.0   | 0.0    | -                       | 1.757                   |
|         | TCTGCCATCCCCAACCCAGACAGCTCTTACTTCTGTGCCACCAGTGATTTGCCTG<br>GACAGCAGTCTACGAGCAGTACTTCGGGCCG  | 0.0   | 0.0    | -                       | 0.586                   |
|         | TCTCTGGAGCTGGGGGACTCAGCTTTGTATTTCTGTGCCAGCAGCGTATCTTCGG<br>GACTAGAGACCGGGGAGCTGTTTTTGGAGAA  | 0.0   | 0.0    | -                       | 17.571                  |
|         | TCGGCTGCTCCCTCCCAGACATCTGTGTACTTCTGTGCCAGCAGTTACTCGTCGA<br>ACAGCGGACTCTACGAGCAGTACTTCGGGCCG | 0.0   | 0.0    | -                       | 1.171                   |
|         | TCGGCCAAAAGAACCCGACAGCTTTCTATCTGTGCCAGTAAACTAACTGGAC<br>AGGGGCTTAACTATGGCTACACCTTCGGTTCG    | 0.0   | 0.0    | -                       | 164.582                 |
|         | TCCACAAAGCTGGAGGACTCAGCCATGTACTTCTGTGCCAGCAGTTGCCCGGG<br>ACAGGCAACAATCAGCCCCAGCATTTTGGTGAT  | 0.0   | 0.0    | -                       | 6.443                   |
|         | TCCACAAAGCTGGAGGACTCAGCCATGTACTTCTGTGCCAGCAGTCTACCCGGG<br>ACGGGGGGCAATCAGCCCCAGCATTTTGGTGAT | 0.0   | 0.0    | -                       | 4.685                   |
|         | TCAGAACCCAGGGACTCAGCTGTGTACTTCTGTGCCAGCGTCTCGGGTCTTTGGT<br>CTGGGGGCGATCAGCCCCAGCATTTTGGTGAT | 0.0   | 0.0    | -                       | 2.343                   |
|         | NTGTCGGCTGCTCCCTCCCAGACATCTGTGTACTTCTGTGCCAGCAGTACTCCA<br>GGACAGGGGACACTGAAGCTTTCTTTGGACAA  | 0.0   | 0.0    | -                       | 50.956                  |
|         | NTGTCGGCTGCTCCCTCCCAGACATCTGTGTACTTCTGTGCCAGCAGTACTCAC<br>GGACAGGGGATGGAAAAGTGTCTTTTGGCAGT  | 0.0   | 0.0    | -                       | 5.857                   |
|         | NTGTCGGCTGCTCCCTCCCAGACATCTGTGTACTTCTGTGCCAGCAGTGCCAGTT<br>CGGGCCATAATTCACCCCTCCACTTTGGGAAC | 0.0   | 0.0    | -                       | 0.586                   |
|         | NNNNNNNTGTCGGCTGCTCCCTCCCAGACATCTGTGTACTTCTGTGCCAGCAGT<br>GAAGTTACAGGGGAAGGCTACACCTTCGGTTCG | 0.0   | 0.0    | -                       | 2.343                   |
|         | NNNNNNNTGTCGGCTGCTCCCTCCCAGACATCTGTGTACTTCTGTGCCAGCAGT<br>GAAGGGGGGACTATGGCTACACCTTCGGTTCG  | 0.0   | 0.0    | -                       | 4.100                   |
|         | NNNNNNNTGTCGGCTGCTCCCTCCCAGACATCTGTGTACTTCTGTGCCAGCAGT                                      | 0.0   | 0.0    | -                       | 1.757                   |

|                                                                                            |     |     |   |        |  |
|--------------------------------------------------------------------------------------------|-----|-----|---|--------|--|
| CGGCCACAAAACACTGAAGCTTCTTTGGACAA                                                           |     |     |   |        |  |
| NNNNNNNTGTCGGCTGCTCCCTCCCAGACATCTGTACTTCTGTGCCAGCAGT<br>CAAGGGGAGGAGAATGGCTACACCTTCGGTTTCG | 0.0 | 0.0 | - | 0.586  |  |
| NNNNNNNTGTCGGCTGCTCCCTCCCAGACATCTGTACTTCTGTGCCAGCAGG<br>CAGGGAGCATCGGGACAGCAGTACTTCGGGCCG  | 0.0 | 0.0 | - | 1.171  |  |
| NNNNNNNTGTCGGCTGCTCCCTCCCAGACATCTGTACTTCTGTGCCACCCGT<br>GGAGGTTCCCTGGGGGGCTACACCTTCGGTTTCG | 0.0 | 0.0 | - | 1.171  |  |
| NNNNNNNTGTCGGCTGCTCCCTCCCAAACATCTGTACTTCTGTGCCAGCGGA<br>CAGGCTTCAATCAGCCCCAGCATTGTTGGTGAT  | 0.0 | 0.0 | - | 1.757  |  |
| NNNNNNNNNNNNNTGTCGGCTGCTCCCTCCCAGACATCTGTACTTCTGTGC<br>CAGCGGGCAGGGCCACGAGCAGTACTTCGGGCCG  | 0.0 | 0.0 | - | 2.929  |  |
| NNNNNNNNNNNNNTGTCGGCTGCTCCCTCCCAGACATCTGTACTTCTGTGC<br>CAGCAGTCATGGGACAATAGCTTCTTTGGACAA   | 0.0 | 0.0 | - | 0.586  |  |
| NNNNNNNNNNNNNTGTCGGCTGCTCCCTCCCAGACATCTGTACTTCTGTGC<br>CAGCAGCCAAGGGGACGAGCAGTACTTCGGGCCG  | 0.0 | 0.0 | - | 0.586  |  |
| NNNNNNNNNNNNNTGTCGGCTGCTCCCTCCCAAACATCTGTACTTCTGTGC<br>CAGCACCAACTCCTACGAGCAGTACTTCGGGCCG  | 0.0 | 0.0 | - | 0.586  |  |
| NCTCTGAAGATCCGGTCCACAAAGCTGGAGGACTCAGCCATGTACTTCTGTGCC<br>AGTAGTTTCTCTACGAGCAGTACTTCGGGCCG | 0.0 | 0.0 | - | 12.885 |  |
| GTGAGCACCTTGGAGCTGGGGGACTCGGCCCTTATCTTTGCGCCAGCAGCGCG<br>GGGACTATTAACACGAGCAGTACTTCGGGCCG  | 0.0 | 0.0 | - | 2.929  |  |
| GTGACCAGTCCCACCTGAAGACAGCAGCTTCTACATCTGCAGTGCTAGAGAA<br>AGGGGCGGTTACTACGAGCAGTACTTCGGGCCG  | 0.0 | 0.0 | - | 0.586  |  |
| GTGACATCGGCCAAAAGAACCCGACAGCTTCTATCTGTGCCAGTAGTATG<br>GGACCGGGACAACCTGGCTACACCTTCGGTTTCG   | 0.0 | 0.0 | - | 21.085 |  |
| GTGAACGCCTTGTTGCTGGGGGACTCGGCCCTATCTGTGCCAGCAGCTTG<br>GCCGGGACAGGGGCTGAAGCTTCTTTGGACAA     | 0.0 | 0.0 | - | 28.699 |  |
| GTGAACGCCTTGGAGCTGGACGACTCGGCCCTGTATCTGTGCCAGCAGCACA<br>GTGGGCTCTGGAAACACCATATATTTGGAGAG   | 0.0 | 0.0 | - | 8.200  |  |
| GCCCTGCAGCCAGAAGACTCAGCCCTGTATCTGTGCCAGCAGCCAAGCCAGA<br>CTACAGAGTGAATGGCTACACCTTCGGTTTCG   | 0.0 | 0.0 | - | 0.586  |  |
| GCCATCCTGAAGACAGCAGCTTCTACATCTGCAGTGCTCCATCAACCCGGGA<br>CTAGCGGGCCGATATGAGCAGTTCTTCGGGCCA  | 0.0 | 0.0 | - | 0.586  |  |
| GAGATCCAGCGCACAGAGCAGGGGACTCGGCCATGTATCTGTGCCAGCAG                                         | 0.0 | 0.0 | - | 0.586  |  |

|                                                                                               |     |     |   |         |
|-----------------------------------------------------------------------------------------------|-----|-----|---|---------|
| CCGTTTCGACAGTAAGCTTTCTTTGGACAA                                                                |     |     |   |         |
| CTTCTCAGTACTCTGGCTTCTATCTCTGTGCCTGGAGTGTTCAGGGACAGGG<br>GATTTTCTTACTATGGCTACACCTTCGGTTTCG     | 0.0 | 0.0 | - | 1.171   |
| CTGGGGGACTCGGCCCTCTATCTCTGTGCCAGCAGCTTGGATAGATACCCCTAT<br>GTGGCTAACACCGGGGAGCTGTTTTTTGGAGAA   | 0.0 | 0.0 | - | 32.213  |
| CTGGAGTCGCCCAGCCCCAACCAGACCTCTCTGTACTTCTGTGCCAGCAGTTTAT<br>GGACAAGTAATTCACCCCTCCACTTTGGGAAC   | 0.0 | 0.0 | - | 108.941 |
| CTGGAGTCGCCCAGCCCCAACCAGACCTCTCTGTACTTCTGTGCCAGCAGGACG<br>GGTTCGGAGAATTCACCCCTCCACTTTGGGAAC   | 0.0 | 0.0 | - | 0.586   |
| CTGGAGCTGGGGGACTCAGCTTTGATTTCTGTGCCAGCAGCGAATTGACAGGC<br>TGGTCGGTCACAGATACGCAGTATTTTGGCCCA    | 0.0 | 0.0 | - | 542.361 |
| CTGCAGCCAGAAGACTCAGCCCTGTATCTCTGTGCCAGCAGCCAAGAAGGGGGCT<br>GAGGACTCTGGAAACACCATATATTTTGGAGAG  | 0.0 | 0.0 | - | 0.586   |
| CTGATCCTGGAGTCGCCCAGCCCCAACCAGACCTCTCTGTACTTCTGTGCCAGTG<br>CCAGGACAGGACATGGCTACACCTTCGGTTTCG  | 0.0 | 0.0 | - | 3.514   |
| CTGAGCTCTCTGGAGCTGGGGGACTCAGCTTTGATTTCTGTGCCAGCAGCCCC<br>GGGGGGGAGGGCTACGAGCAGTACTTCGGGCCG    | 0.0 | 0.0 | - | 7.028   |
| CTGAGCTCTCTGGAGCTGGGGGACTCAGCTTTGATTTCTGTGCCAGCAGCCCAT<br>CAGGGGGAAGTCAGCCCCAGCATTTCGGTGAT    | 0.0 | 0.0 | - | 3.514   |
| CTCACTGTGACATCGGCCAAAAGAACCCGACAGCTTTCTATCTCTGTGCCAGTG<br>GCTTGGGGCTGGAGCCCCAGCATTTCGGTGAT    | 0.0 | 0.0 | - | 20.500  |
| CGGTCCACAAAGCTGGAGGACTCAGCCATGTACTTCTGTGCCAGCAGTTTTCTA<br>GGGACGGCGGGCACTGAAGCTTTCTTTGGACAA   | 0.0 | 0.0 | - | 33.385  |
| CGGTCCACAAAGCTGGAGGACTCAGCCATGTACTTCTGTGCCAGCAGGGGGAC<br>AGGGTCCCCAATCAGCCCCAGCATTTCGGTGAT    | 0.0 | 0.0 | - | 0.586   |
| CGGTCCACAAAGCTGGAGGACTCAGCCATGTACTTCTGTGCCAGCAGAGACAG<br>GGTCGCCTATAATTCACCCCTCCACTTTGGGAAC   | 0.0 | 0.0 | - | 6.443   |
| CCTGCAAAGCTTGAGGACTCGGCCGTGTATCTCTGTGCCAGCAGCCCCCTAGCG<br>GGCGAGGTGAACACTGAAGCTTTCTTTGGACAA   | 0.0 | 0.0 | - | 0.586   |
| CAGCCCTCAGAACCAGGGGACTCAGCTGTGTACTTCTGTGCCAGCAGCCCCCTCA<br>GACAGGGGAGGGTATGGCTACACCTTCGGTTTCG | 0.0 | 0.0 | - | 0.586   |
| CACATCAATTCCTGGAGCTTGGTACTCTGCTGTGTATTTCTGTGCCAGCAGCC<br>AAGGGGCCAAGGCTTCTCAGCATTTCGGTGAT     | 0.0 | 0.0 | - | 0.586   |
| CAAAAGAACCCGACAGCTTTCTATCTCTGTGCCAGTAGTACTTTTACGGGACAG                                        | 0.0 | 0.0 | - | 0.586   |

|                                                                                             |     |     |   |         |
|---------------------------------------------------------------------------------------------|-----|-----|---|---------|
| AGATCACCATAGATGGCTACACCTTCGGTTCG                                                            |     |     |   |         |
| CAAAAGAACCCGACAGCTTTCTATCTCTGTGCCAGTACCCGGGCAACCCTCGACT<br>CCTTGAGCTCCTACGAGCAGTACTTCGGGCCG | 0.0 | 0.0 | - | 0.586   |
| ATGAGCTCCTTGGAGCTGGGGGACTCAGCCCTGTACTTCTGTGCCAGCAGTTGG<br>GGCAGGGGCGAGTACGAGCAGTACTTCGGGCCG | 0.0 | 0.0 | - | 2.929   |
| ATCCTGAGGATCCAGCAGGTAGTGCAGGAGATTCCGGCAGCTTATTTCTGTGCC<br>AGCTCACGTGGAGATACGCAGTATTTGGCCCA  | 0.0 | 0.0 | - | 10.543  |
| ATCAATTCCTGGAGCTTGGTGACTCTGCTGTGTATTTCTGTGCCAGCAGCCCCG<br>GCGCGGTTCACTACGAGCAGTACTTCGGGCCG  | 0.0 | 0.0 | - | 1.757   |
| ATCAATTCCTGGAGCTTGGTGACTCTGCTGTGTATTTCTGTGCCAGCAGCCCAG<br>GAGCCAGAGACTACGAGCAGTACTTCGGGCCG  | 0.0 | 0.0 | - | 29.285  |
| AGTTCTAAGAAGCTCCTTCTCAGTGACTCTGGCTTCTATCTCTGTGCCTGGAGTA<br>GGGGGAGAATCAGCCCCAGCATTTTGGTGAT  | 0.0 | 0.0 | - | 2.343   |
| AGGATCCAGCAGGTAGTGCAGGAGATTCCGGCAGCTTATTTCTGTGCCAGCTCA<br>CCACCGTCATCCTACGAGCAGTACTTCGGGCCG | 0.0 | 0.0 | - | 9.957   |
| AGCTCCTTGGAGCTGGGGGACTCAGCCCTGTACTTCTGTGCCAGCAGCGACATA<br>GTGGCCAACACAGATACGCAGTATTTGGCCCA  | 0.0 | 0.0 | - | 1.757   |
| ACTGTGACATCGGCCCAAAAGAACCCGACAGCTTTCTATCTCTGTGCCACCCGAC<br>AGGTGGATAATTACCCCTCCACTTTGGGAAC  | 0.0 | 0.0 | - | 4.100   |
| ACCTTGGAGCTGGGGGACTCGGCCCTTATCTTTGCGCCAGCAGCTTGTCAG<br>ACGGCGAATAATTACCCCTCCACTTTGGGAAC     | 0.0 | 0.0 | - | 2.929   |
| ACATCGGCCCAAAAGAACCCGACAGCTTTCTATCTCTGTGCCAGTAGTATCGGTC<br>ACACCCAAAATATGGCTACACCTTCGGTTCG  | 0.0 | 0.0 | - | 0.586   |
| ACATCGGCCCAAAAGAACCCGACAGCTTTCTATCTCTGTGCCAGTAGTATTTG<br>GACAGGGAGATGAAAACTGTTTTTGGCAGT     | 0.0 | 0.0 | - | 0.586   |
| ACATCGGCCCAAAAGAACCCGACAGCTTTCTATCTCTGTGCCAGTAGTACTACTA<br>GCGGTTCTACAATGAGCAGTTCTTCGGGCCA  | 0.0 | 0.0 | - | 576.917 |
| ACAGTGACCAGTGCCCATCTGAAGACAGCAGCTTCTACATCTGCAGTGCTTCC<br>GGGACAAACAATCAGCCCCAGCATTTTGGTGAT  | 0.0 | 0.0 | - | 1.171   |
| ACAGTGACCAGTGCCCATCTGAAGACAGCAGCTTCTACATCTGCAGTGCTAGC<br>CGGGACGACCCCTACGAGCAGTACTTCGGGCCG  | 0.0 | 0.0 | - | 1.757   |
| ACAGAGCAGGGGGACTCGGCCATGTATCTCTGTGCCAGCAGCGACAAATACCCT<br>CTGGACTATAATTACCCCTCCACTTTGGGAAC  | 0.0 | 0.0 | - | 0.586   |
| AATGTGAGCACCTTGGAGCTGGGGGACTCGGCCCTTATCTTTGCGCCAGCAGC                                       | 0.0 | 0.0 | - | 1.171   |

|   |                                                                                             |     |         |         |         |
|---|---------------------------------------------------------------------------------------------|-----|---------|---------|---------|
|   | TTGTCAGCAGATTACGAGCAGTACTTCGGGCCG                                                           |     |         |         |         |
|   | AAGATCCGGTCCACAAAGCTGGAGGACTCAGCCATGTACTTCTGTGCCAGGGG<br>GCGAGGGACTCAGTACGAGCAGTACTTCGGGCCG | 0.0 | 0.0     | -       | 2.343   |
|   | AAGATCCGGTCCACAAAGCTGGAGGACTCAGCCATGTACTTCTGTGCCAGCAGG<br>GTGGGACCCCTAACACCATATATTTTGGAGAG  | 0.0 | 0.0     | -       | 5.271   |
|   | AAGATCCGGTCCACAAAGCTGGAGGACTCAGCCATGTACTTCTGTGCCAGCAGC<br>TGGGACAGCCAAAATGAAGCTTCTTTGGACAA  | 0.0 | 0.0     | -       | 484.962 |
|   | AAGATCCGGTCCACAAAGCTGGAGGACTCAGCCATGTACTTCTGTGCCAGCAAA<br>CCCGGGGTGAACACTGAAGCTTCTTTGGACAA  | 0.0 | 0.0     | -       | 0.586   |
|   | AAGAACCCGACAGCTTCTATCTCTGTGCCAGTAGTATTTTCTTCGGACTTGAGG<br>AGAGCTCTGGAAAACCATATATTTTGGAGAG   | 0.0 | 0.0     | -       | 2.343   |
|   | AACCTGAGCTCTCTGGAGCTGGGGGACTCAGCTTGTATTTCTGTGCCAGCAGC<br>GTAGGACAGCTGTACGAGCAGTACTTCGGGCCG  | 0.0 | 0.0     | -       | 3.514   |
|   | AACCCGACAGCTTCTATCTCTGTGCCAGTAGTATCTGGGCCCGTTGGAAACA<br>GGGACCGACACCGGGGAGCTGTTTTTGGAGAA    | 0.0 | 0.0     | -       | 0.586   |
|   | AAGGTGCAGCTGCAGAAGCTGGAGGATTCTGGAGTTTATTTCTGTGCCAGCAGC<br>CAGTACCGGGGGGACCCAGTACTTCGGGCCA   | 0.0 | 472.813 | 175.233 | 153.266 |
|   | GTGACCAGTGCCCATCCTGAAGACAGCAGCTTCTACATCTGCAGTGCCGAGGTG<br>GACAGCCCCACAGATACGCAGTATTTTGGGCCA | 0.0 | 709.220 | 292.056 | 589.484 |
|   | CAGCGCACAGAGCAGGAGGACTCGGCCGTGTATCTCTGTGCCAGCAGCTTCTG<br>ACTAGCGGCACAGATACGCAGTATTTTGGGCCA  | 0.0 | 0.0     | 175.234 | 294.742 |
|   | NTGTCGGCTGCTCCCTCCAAACATCTGTGTACTTCTGTGCCAGCAGTTCCCCC<br>GGGATGGATCCTACGAGCAGTACTTCGGGCCG   | 0.0 | 0.0     | 0.0     | 11.790  |
| 2 | NNNNTGTCGGCTGCTCCCTCCAGACATCTGTGTACTTCTGTGCCAGCAGTGCC<br>GACAGTGCCAATCAGCCCCAGCATTTTGGTGAT  | 0.0 | 0.0     | 0.0     | 11.790  |
|   | GTGACCAGTGCCCATCCTGAAGACAGCAGCTTCTACATCTGCAGTGCAAAACAG<br>GGAATTAGCAATCAGCCCCAGCATTTTGGTGAT | 0.0 | 0.0     | 116.822 | 165.055 |
|   | GCCATCCTGAAGACAGCAGCTTCTACATCTGCAGTGTTACCGGGACTAGCGGG<br>ACGAGGAGCTCCTACGAGCAGTACTTCGGGCCG  | 0.0 | 0.0     | 0.0     | 35.369  |
|   | ACCAGTGCCATCCTGAAGACAGCAGCTTCTACATCTGCAGTGCTAGAGATCTG<br>TGGGGGTTTAGGAACGAGCAGTACTTCGGGCCG  | 0.0 | 0.0     | 0.0     | 11.790  |
|   | AAGCTTGAGGACTCGGCCGTGTATCTCTGTGCCAGCAGCCCCCAATCCGCTGGG<br>GAAAGATATAATTACCCCTCCACTTTGGGAAC  | 0.0 | 0.0     | 58.411  | 35.369  |
|   | GAGTCCGCCAGCACCAACCAGACATCTATGTACCTCTGTGCCAGCACCAGGGGG                                      | 0.0 | 0.0     | 0.0     | 11.790  |

|   |                                                                                              |     |        |     |        |
|---|----------------------------------------------------------------------------------------------|-----|--------|-----|--------|
|   | TCAAGCTCTACAATGAGCAGTTCTTCGGGCCA                                                             |     |        |     |        |
|   | ATCCAGCCTGCAAAGCTTGAGGACTCGGCCGTGTATCTCTGTGCCAGCAGCCCCG<br>CAGATCGTAGGAAACACCATATATTTTGGAGAG | 0.0 | 0.0    | 0.0 | 11.790 |
| 3 | TTGGCTGCTCCCTCCCAGACATCTGTGTAATTCTGTGCCAGCAGTTGGGACAGG<br>GGGCGAGTCAACTATGGCTACACCTTCGGTTCG  | 0.0 | 19.264 | -   | 3.775  |
|   | TCGGCTGCTCCCTCCCAGACATCTGTGTAATTCTGTGCCAGCAGTTAGGGCCTC<br>TAGCGGGGCAAGAGACCCAGTACTTCGGGCCA   | 0.0 | 19.264 | -   | 7.549  |
|   | NTGTCGGCTGCTCCCTCCAAACATCTGTGTAATTCTGTGCCAGCACCGAAGGG<br>GGGTTTGTTCGAGGGACCCAGTACTTCGGGCCA   | 0.0 | 19.264 | -   | 3.775  |
|   | GTGAGCACCTTGAGCTGGGGGACTCGGCCCTTATCTTTCGCGCCAGCAGCTTG<br>GAAGAATCCCTCAGTGAGCAGTTCTTCGGGCCA   | 0.0 | 19.264 | -   | 11.324 |
|   | GTGACCAGTGCCATCCTGAAGACAGCAGCTTCTACATCTGCAGTGCTTGGCCT<br>AGCGGAAGCTCCTACGAGCAGTACTTCGGGCCG   | 0.0 | 19.264 | -   | 7.549  |
|   | GAACCCAGGGACTCAGCTGTGTAATTCTGTGCCAGCAGTTAAGCCTAGGGACA<br>GGTCGTAGCACCGGGGAGCTGTTTTTGGAGAA    | 0.0 | 19.264 | -   | 26.423 |
|   | CTGATTCTGGAGTCCGCCAGCACCAACCAGACATCTATGTACCTCTGTGCCAGCA<br>GTTTAGGTTACTACGAGCAGTACTTCGGGCCG  | 0.0 | 38.528 | -   | 26.423 |
|   | CGGTCCAAAGCTGGAGGACTCAGCATGTACTTCTGTGCCAGCAGTGATACA<br>GGGGGCTTACAATGAGCAGTTCTTCGGGCCA       | 0.0 | 38.528 | -   | 3.775  |
|   | CCCTCAGAACCAGGGACTCAGCTGTGTAATTCTGTGCCAGCAGTTTTGCGCGTA<br>TTGCGAGCACCGGGGAGCTGTTTTTGGAGAA    | 0.0 | 19.264 | -   | 18.874 |
|   | CCCTCAGAACCAGGGACTCAGCTGTGTAATTCTGTGCCAGCAGTAACCCGGGA<br>CAGGGGGCTGGTGGCATTCACTACTTCGGCGCC   | 0.0 | 19.264 | -   | 22.648 |
|   | CATCTGAAGACAGCAGCTTCTACATCTGCAGTGCTAGGGAGATTGGGACAGG<br>GCTTAGCTCCTACAATGAGCAGTTCTTCGGGCCA   | 0.0 | 19.264 | -   | 18.874 |
|   | CAGCGCACAGAGCAGGGGGACTCGGCCATGTATCTCTGTGCCAGCAGCTTTAG<br>GACTAGCGGTGCCTACGAGCAGTACTTCGGGCCG  | 0.0 | 19.264 | -   | 7.549  |
|   | CAGCCCTCAGAACCAGGGACTCAGCTGTGTAATTCTGTGCCAGCAGTTTAGCG<br>ACGGGAAGACATCAGCCCCAGATTTTGGTGAT    | 0.0 | 38.528 | -   | 11.324 |
|   | CAGCAGGTAGTGCGAGGAGATTCCGGCAGCTATTTCTGTGCCAGCTCGCTCAAA<br>GAAAGGACAGTCGAGGAGCAGTACTTCGGGCCG  | 0.0 | 19.264 | -   | 11.324 |
|   | ATCCAGCCTGCAGAGCTTGGGGACTCGGCCGTGTATCTCTGTGCCAGCAGCTTA<br>GACGTGAAAGGCTTGAAGCTTCTTGGACAA     | 0.0 | 19.264 | -   | 26.423 |
|   | AGGATCCAGCAGGTAGTGCGAGGAGATTCCGGCAGCTATTTCTGTGCCAGCTCC                                       | 0.0 | 19.263 | -   | 22.648 |

|                                                                                              |     |        |   |        |
|----------------------------------------------------------------------------------------------|-----|--------|---|--------|
| CTCAAACAGGGAGCTGAAGCTTTCTTTGGACAA                                                            |     |        |   |        |
| AGCACCTTGGAGCTGGGGGACTCGGCCCTTATCTTTGCGCCAGCAGCCCCGAA<br>GAAGCAGTTAGCACTGAAGCTTTCTTTGGACAA   | 0.0 | 38.528 | - | 11.324 |
| ACCCTGCAGCCAGAAGACTCGGCCCTGTATCTCTGTGCCAGCAGCCCCCGACA<br>GGCGAATCGAACTATGGCTACACCTTCGGTTCG   | 0.0 | 77.056 | - | 64.170 |
| ACAGTGACCAGTGCCCATCCTGAAGACAGCAGCTTCTACATCTGCAGTGCTAGG<br>GAGGAAAGGGATGAAAACTGTTTTTGGCAGT    | 0.0 | 19.264 | - | 26.423 |
| ACAGTGACCAGTGCCCATCCTGAAGACAGCAGCTTCTACATCTGCAGTGCTAGA<br>GAGGACAGGGAGGAAAACTGTTTTTGGCAGT    | 0.0 | 19.264 | - | 3.775  |
| ACAGCACTGATTTCTGTGCCAGCAGCAAAGCGCTTTTGGCAATCTGGAGACTA<br>GCGGGAGGGCTCCATGAGCAGTTCTTCGGGCCA   | 0.0 | 19.264 | - | 11.324 |
| AATGTGAACGCCTTGTTGCTGGGGGACTCGGCCCTGTATCTCTGTGCCAGCACC<br>CCGGACCTCAATCAGCCCCAGCATTTTGGTGAT  | 0.0 | 38.528 | - | 37.747 |
| TTGGAGCTGGGGGACTCGGCCCTTATCTTTGCGCCAGCAGCTTGAGGAAGCA<br>AGCGGGAAACGCAATGAGCAGTTCTTCGGGCCA    | 0.0 | 0.0    | - | 11.324 |
| TTGGAGCTGGAGGACTCGGCCCTGTATCTCTGTGCCAGCAGCTTGAAGTCCAGT<br>AGGCTAGGCCAAGAGACCCAGTACTTCGGGCCA  | 0.0 | 0.0    | - | 3.775  |
| TCCACTCTGACAGTGACCAGTGCCCATCCTGAAGACAGCAGCTTCTACATCTGCA<br>GTGCTTGGTTCGGATGAGCAGTTCTTCGGGCCA | 0.0 | 0.0    | - | 7.549  |
| NNNNNNNNNNNNNTGTCGGCTGCTCCCTCCAGACATCTGTGTACTTCTGTGC<br>CAGCAGTAACTCCTACGAGCAGTACTTCGGGCCG   | 0.0 | 0.0    | - | 7.549  |
| NNNNNNNNNNNNNTGTCGGCTGCTCCCTCCAGACATCTGTGTACTTCTGTGC<br>CAGCACATCCGGGACGGCCTACACCTTCGGTTCG   | 0.0 | 0.0    | - | 15.100 |
| GTGAGCACCTTGGAGCTGGGGGACTCGGCCCTTATCTTTGCGCCAGCAGCTTG<br>GATGGGTACGGGCAGCCCCAGCATTTTGGTGAT   | 0.0 | 0.0    | - | 11.324 |
| GTGAGCAACATGAGCCCTGAAGACAGCAGCATATATCTCTGCAGCGTTATACCG<br>ACAGCAACTAATGAAAACTGTTTTTGGCAGT    | 0.0 | 0.0    | - | 37.747 |
| GTGACCAGTGCCCATCCTGAAGACAGCAGCTTCTACATCTGCAGTGGCACTGAG<br>GTTCTTTCCATTTACGAGCAGTACTTCGGGCCG  | 0.0 | 0.0    | - | 3.775  |
| GTGACCAGTGCCCATCCTGAAGACAGCAGCTTCTACATCTGCAGTGCGCATGAC<br>AGCGGTGGTAATGAAAACTGTTTTTGGCAGT    | 0.0 | 0.0    | - | 7.549  |
| GTGACATCGGCCCAAAGAACCCGACAGCTTTCTATCTCTGTGCCAGTAGTATTG<br>AGACACCGACCTACGAGCAGTACTTCGGGCCG   | 0.0 | 0.0    | - | 3.775  |
| GTGAACGCCTTGGAGCTGGACGACTCGGCCCTGTATCTCTGTGCCAGCAGCTTG                                       | 0.0 | 38.528 | - | 0.0    |

|                                                                                              |     |        |   |        |
|----------------------------------------------------------------------------------------------|-----|--------|---|--------|
| GCGGGGAATTATTCGTCCTGACTTTCGGGGCC                                                             |     |        |   |        |
| GCTGTACCTCTCAGACATCTGTGACTTCTGTGCCAGCACTATAAGAGGAGGA<br>CAGGGGTCTGACTGAAGCTTCTTTGGACAA       | 0.0 | 0.0    | - | 18.874 |
| GCCCTGCAGCCAGAAGACTCAGCCCTGTATCTCTGCGCCAGCAGCCAAGGGCG<br>GACAGGGAGATCCTACGAGCAGTACTTCGGGCCG  | 0.0 | 38.528 | - | 0.0    |
| GAGGATTCTGGAGTTTATTTCTGTGCCAGCAGCCAAGAAACCGGGACAGGGCTC<br>CGCTCTGGGGCCAACGTCCTGACTTTCGGGGCC  | 0.0 | 0.0    | - | 11.324 |
| CTGGAGTTGGCTGCTCCCTCCAGACATCTGTGACTTCTGTGCCAGCGGTTTAC<br>AGTCGAACACCGGGGAGCTGTTTTTTGGAGAA    | 0.0 | 0.0    | - | 18.874 |
| CTGGAGTCGCCAGCCCCAACCCAGACCTCTCTGACTTCTGTGCCAGCAGCTTCT<br>GGGGAGGACAAGAGACCCAGTACTTCGGGGCCA  | 0.0 | 0.0    | - | 11.324 |
| CTGATTCTGGAGTCCGCCAGCACCAACCAGACATCTATGTACCTCTGTGCCAGCA<br>GTTTGGCGACGGGGGAGCAGTACTTCGGGGCCG | 0.0 | 0.0    | - | 3.775  |
| CTGACAGTGACCAGTGCCCATCCTGAAGACAGCAGCTTCTACATCTGCAGTGTA<br>CAGGCGGACACCGGGGAGCTGTTTTTTGGAGAA  | 0.0 | 0.0    | - | 3.775  |
| CTGACAGTGACCAGTGCCCATCCTGAAGACAGCAGCTTCTACATCTGCAGTGCC<br>TGGACAGCCATGGACGAGCAGTACTTCGGGGCCG | 0.0 | 0.0    | - | 3.775  |
| CCCTCAGAACCAGGGACTCAGCTGTGACTTCTGTGCCAGCAGTAATCCGGGA<br>CAGGGTATATTCCAGCCCAGCATTTTGGTGAT     | 0.0 | 0.0    | - | 7.549  |
| ATCCCAACCAGACAGCTTTTACTTCTGTGCCACCAGTGCCCATAGAGGGACA<br>GGGATCGGTTACAATGAGCAGTCTTCGGGGCCA    | 0.0 | 0.0    | - | 7.549  |
| ATCCAGCCCTCAGAACCAGGGACTCAGCTGTGACTTCTGTGCCAGCAGAAGT<br>GGGAGCCCTTCTCGAGAGCAGTACTTCGGGGCCG   | 0.0 | 0.0    | - | 3.775  |
| AGCACCTTGGAGCTGGGGGACTCGGCCCTTTATCTTTCGCCAGCAGCCTGGAC<br>GGGGATTGGGATTCACCCCTCACTTTGGGAAC    | 0.0 | 0.0    | - | 3.775  |
| ACTGTGACATCGGCCAAAAGAACCCGACAGCTTCTATCTCTGTGCCAGTCAA<br>GACAGACTGAACACTGAAGCTTCTTTGGACAA     | 0.0 | 0.0    | - | 3.775  |
| ACAGTGACCAGTGCCCATCCTGAAGACAGCAGCTTCTACATCTGCAGTGCTAGG<br>GAGGACAGGGAGGAAAAACTGTTTTTTGGCAGT  | 0.0 | 0.0    | - | 3.775  |
| ACAGTGACCAGTGCCCATCCTGAAGACAGCAGCTTCTACATCTGCAGTGCTAGA<br>CGGGAGAGAGATGAAAAACTGTTTTTTGGCAGT  | 0.0 | 0.0    | - | 15.100 |
| ACAGAGCAGGAGGACTCGGCCGTGTATCTCTGTGCCAGCAGCGAGACAGGGGC<br>CGTTGCAACTAATGAAAAACTGTTTTTTGGCAGT  | 0.0 | 0.0    | - | 3.775  |
| AAGATCCAGCGCACAGAGCGGGGGACTCAGCCGTGTATCTCTGTGCCAGCAG                                         | 0.0 | 0.0    | - | 7.549  |



|   |                                                                                            |     |          |   |          |
|---|--------------------------------------------------------------------------------------------|-----|----------|---|----------|
|   | CTTAAAAGGGGGACAGGACTGTTCTTCGGGCCA                                                          |     |          |   |          |
|   | AACGCCTTGGAGCTGGACGACTCGGCCCTGTATCTCTGTGCCAGCAGCGTGACA<br>GGGGAGCTTGATGAAAACTGTTTTTGGCAGT  | 0.0 | 0.0      | - | 11.324   |
| 4 | NNNNTGTCGGCTGCTCCCTCCAGACATCTGTGTACTTCTGTGCCAGCAGGGAC<br>CCCGGGGGAATGAAAACTGTTTTTGGCAGT    | 0.0 | 714.300  | - | 0.0      |
|   | GTGAGCACCTTGGAGCTGGGGGACTCGGCCCTTATCTTTGCGCCAGCAGGATA<br>GACCTGAATTACAATGAGCAGTTCTTCGGGCCA | 0.0 | 2142.900 | - | 0.0      |
|   | CACACCCTGCAGCCAGAAGACTCGGCCCTGTATCTCTGTGCCAGCAGCCAAGGG<br>GCCAGGTGGGGGAAAACTGTTTTTGGCAGT   | 0.0 | 0.0      | - | 1754.400 |
|   | NNNNNNNTGTCGGCTGCTCCCTCCAGACATCTGTGTACTTCTGTGCCAGCAGT<br>TACGTTGGGGCCGGGAGCTGTTTTTGGAGAA   | 0.0 | 0.0      | - | 3508.800 |
|   | CCGACAGCTTCTATCTCTGTGCCAGTAGTATGTACGGTAGAGGGGCGGAGGCA<br>AACTTATACTATTATGGCTACACCTTCGGTTCG | 0.0 | 0.0      | - | 1754.400 |
|   | GTGAGCACCTTGGAGCTGGGGGACTCGGCCCTTATCTTTGCGCCAGCAGCTTG<br>GAGGAGGCTAACTATGGCTACACCTTCGGTTCG | 0.0 | 0.0      | - | 1754.400 |

- No evaluable tumor samples.
