# Supplementary material for: Intratumoral IFN-γ or topical TLR7 agonist promotes infiltration of melanoma metastases by T lymphocytes expanded in the blood after cancer vaccine
Source: PubMed Central journal article supplement — J Immunother Cancer. 2023 Feb 6;11(2):e005952. doi: 10.1136/jitc-2022-005952 (PMC9906378; doi:10.1136/jitc-2022-005952), 2023-02-06
Supplement: jitc-2022-005952supp007.pdf [file jitc-2022-005952supp007.pdf]

Supplemental Table 7 – Number of T cells per clonotype (per 100,000 cells) by treatment day in Mel53

| Patient | TCR Sequence                                                                                | Day 1 | Day 22 (-Imiquimod) | Day 22 (+Imiquimod) | Day 43  |
|---------|---------------------------------------------------------------------------------------------|-------|---------------------|---------------------|---------|
| 5       | TTGCTGGGGGACTCGGCCCTCTATCTCTGTGCCAGCAGCTCCGTACCG<br>CTAGCGGGGGCTCCGTGGGACGAGCAGTACTTCGGGCCG | 0.0   | -                   | 147.131             | 99.145  |
|         | NTGTCGGCTGCTCCCTCCAGACATCTGTGTACTTCTGTGCCAGCAGT<br>TACGCCCCAGGGGGCTCTGAAAACTGTTTTTGGCAGT    | 0.0   | -                   | 24.522              | 37.179  |
|         | TCCCAGACATCTGTGTACTTCTGTGCCATCAGTGGGGGGGCTGACCGT<br>GCCCCGTCGGGAATAATTCACCCCTCCACTTTGGGAAC  | 0.0   | -                   | 0.0                 | 6.197   |
|         | GAGCTGGGGGACTCGGCCCTTATCTTTGCGCCAGCAGCCCAGAGGG<br>AGGCGGAGGGGGACCCATCAGCCCCAGCATTTTGGTGAT   | 0.0   | -                   | 0.0                 | 6.197   |
| 6       | GCCAAAAGAACCCGACAGCTTCTATCTCTGTGCCAGTAGTATGCAA<br>CGGGAGGCGGGGGACAGATACGCAGTATTTGGCCCA      | 0.0   | 0.0                 | 98.692              | 157.729 |
|         | CTGACCTGTCCAATCTGACAGTGACCACTGCCATCTGAAGACAGC<br>AGCTTCTACATCTGCAGTGCTAGCGGGGACTCGGTTCCG    | 0.0   | 0.0                 | 30.156              | 78.864  |
|         | CTGACAGTGACCACTGCCATCCTGAAGACAGCAGCTTCTACATCTGC<br>AGTGCGGCGGAGGGTGGTGGACCCAGCATTTTGGTGAT   | 0.0   | 0.0                 | 71.278              | 78.864  |
|         | NTGTCGGCTGCTCCCTCCAGACATCTGTGTACTTCTGTGCCAGCAGT<br>GAGCAACAGGGGACGAATTCACCCCTCCACTTTGGGAAC  | 0.0   | 0.0                 | 95.951              | 78.864  |
|         | GTGAGCAACATGAGCCCTGAAGACAGCAGCATATATCTCTGCAGCGT<br>TCGTATGAGCGGGGGGCGAGTCGAGCAGTACTTCGGGCCG | 0.0   | 0.0                 | 208.350             | 78.864  |
|         | GTGAGCAACATGAGCCCTGAAGACAGCAGCATATATCTCTGCAGCGT<br>CGCCGCGGCGATCGGGGATCAGCCCCAGCATTTTGGTGAT | 0.0   | 0.0                 | 19.190              | 78.864  |
|         | GAGTCGCCCAGCCCCAACCACTCTGTACTTCTGTGCCAGCAGT<br>TTATCGGGACAGGCGAACACTGAAGCTTTCTTTGGACAA      | 0.0   | 0.0                 | 16.449              | 0.0     |
|         | GAGTCGCCCAGCACCACCACTCTATGTACCTCTGTGCCAGCAGT<br>TTGGGACAGCTTAGCAATCAGCCCCAGCATTTTGGTGAT     | 0.0   | 0.0                 | 19.190              | 78.864  |
|         | CTGACAGTGACCACTGCCATCCTGAAGACAGCAGCTTCTACATCTGC<br>GGGGCCCTACAGGATTTAGAGACCCAGTACTTCGGGCCA  | 0.0   | 0.0                 | 13.707              | 78.864  |
|         | CTGAAGATCCGGTCCACAAAGCTGGAGGACTCAGCCATGTACTTCTGT<br>GCCAGCAGGAAACGAACACTGAAGCTTTCTTTGGACAA  | 0.0   | 0.0                 | 183.678             | 78.864  |
|         | ATCCTGAGGATCCAGCAGGTAGTGCGAGGAGATTCGGCAGCTTATTT<br>CTGTGCCAGCTCACCTGGGGTGACCCAGTACTTCGGGCCA | 0.0   | 0.0                 | 71.278              | 0.0     |
|         | AGGATCCAGCAGGTAGTGCGAGGAGATTCGGCAGCTTATTTCTGTGC                                             | 0.0   | 0.0                 | 90.470              | 78.864  |

|                                                                                              |     |     |         |         |
|----------------------------------------------------------------------------------------------|-----|-----|---------|---------|
| CAGCTCACAAAGACCTGGACGAGGTTTCGGCATTTTGGTGAT                                                   |     |     |         |         |
| AGCACCTTGGAGCTGGGGGACTCGGCCCTTTATCTTTGCGCCAGCAG<br>CTTAAACGGGCAGGGGAAGGGGAGCAGTACTTCGGGCCG   | 0.0 | 0.0 | 60.312  | 78.864  |
| ACGGAGTCAGGGGACACAGCACTGTATTTCTGTGCCAGCAGCAACGC<br>CAAGAGCCTAGCTAGCACAGATACGCAGTATTTGGCCCA   | 0.0 | 0.0 | 16.449  | 0.0     |
| ACATCGGCCAAAAGAACCCGACAGCTTTCTATCTCTGTGCCAGTAGT<br>ACGTCCGGGACAACCTATTACGAGCAGTACTTCGGGCCG   | 0.0 | 0.0 | 54.829  | 78.864  |
| ACATCGGCCAAAAGAACCCGACAGCTTTCTATCTCTGTGCCAGTAGT<br>ACCTCCGGGACAGTACACTACGAGCAGTACTTCGGGCCG   | 0.0 | 0.0 | 68.536  | 78.864  |
| ACAGTGACCAGTGCCCATCTGAAGACAGCAGCTTCTACATCTGCAGT<br>GCTAGTGGACAGGTGGCGACTCGTTACACCTTCGGTTTCG  | 0.0 | 0.0 | 21.932  | 78.864  |
| AATGTGAGCACCTTGGAGCTGGGGGACTCGGCCCTTTATCTTTGCGCC<br>AGCAGCACGGACAGCGGTGCTGGCTACACCTTCGGTTTCG | 0.0 | 0.0 | 13.707  | 78.864  |
| AAGATCCAGCGCACAGAGCGGGGGGACTCAGCCGTGTATCTCTGTGC<br>CAGCAGCTTATTCGGCAGCTATGGCTACACCTTCGGTTTCG | 0.0 | 0.0 | 208.350 | 157.729 |
| TCGGTGCTCCCTCCAGACATCTGTGTAATTCTGTGCCAGCAGTTCTC<br>CGGGACTAGCGGGAGCGGGGGAGCAGTTCTTCGGGCCA    | 0.0 | 0.0 | 32.897  | 0.0     |
| TCGGCCAAAAGAACCCGACAGCTTTCTATCTCTGTGCCAGTAGTACC<br>ACCGGGACAGATCGACCTTACGAGCAGTACTTCGGGCCG   | 0.0 | 0.0 | 41.122  | 0.0     |
| TCGGCCAAAAGAACCCGACAGCTTTCTATCTCTGTGCCAGTAGTAAC<br>AAAAACCGGGGCGGCACCGGGGAGCTGTTTTTTGGAGAA   | 0.0 | 0.0 | 60.312  | 0.0     |
| TCGCCAGCCCCAACCAGACCTCTGTACTTCTGTGCCAGCCGACCG<br>GGACAGCCATCCTATAATTCACCCCTCCACTTTGGGAAC     | 0.0 | 0.0 | 21.932  | 0.0     |
| NTGTCGGTGCTCCCTCCAAACATCTGTGTAATTCTGTGCCAGCAGT<br>TCGTTGGGACAACCCGATTACGAGCAGTACTTCGGGCCG    | 0.0 | 0.0 | 2.741   | 0.0     |
| NNNNNNNNNTGTCGGTGCTCCCTCCAAACATCTGTGTAATTCTGT<br>TGCCAGCAGTCAAACGATTGGGGAGCTGTTTTTTGGAGAA    | 0.0 | 0.0 | 13.707  | 0.0     |
| NCTCTACTGTGACATCGGCCAAAAGAACCCGACAGCTTTCTATCTC<br>TGTGCCAGTAGGTCGACCGAAAACTGTTTTTTGGCAGT     | 0.0 | 0.0 | 65.795  | 0.0     |
| GTGAGCAACATGAGCCCTGAAGACAGCAGCATATATCTCTGCAGCGT<br>TGCCCTCTTTCTCAGGACCGTAAGCCACATTTGGACAA    | 0.0 | 0.0 | 49.346  | 0.0     |
| GTGACCAGTGCCATCCTGAAGACAGCAGCTTCTACATCTGCAGTGCC<br>GGGGCAGGGTCCAGGCCCGGGGCTACACCTTCGGTTTCG   | 0.0 | 0.0 | 8.224   | 0.0     |
| GTGACATCGGCCAAAAGAACCCGACAGCTTTCTATCTCTGTGCCAGT                                              | 0.0 | 0.0 | 13.707  | 0.0     |

|                                                                                             |     |     |        |     |
|---------------------------------------------------------------------------------------------|-----|-----|--------|-----|
| ATGGGGACAGTGGATGGTTCAACCCTCCACTTTGGGAAC                                                     |     |     |        |     |
| GCCCATCTGAAGACAGCAGCTTCTACATCTGCAGTGCTAGGTTGATA<br>GCGGGAGGGGTCCGTGCAGATACGCAGTATTTGGCCCA   | 0.0 | 0.0 | 49.346 | 0.0 |
| GAGTTGGCTGCTCCCTCCAGACATCTGTGACTTCTGTGCCAGCAGT<br>CGGTCAGGGACACCTGGAACACCATATATTTGGAGAG     | 0.0 | 0.0 | 8.224  | 0.0 |
| GAGTCCGCTACCAGCTCCAGACATCTGTGACTTCTGTGCCATCAGT<br>GAGTCCGGGGTCCCAAGAGACCCAGTACTTCGGGCCA     | 0.0 | 0.0 | 74.019 | 0.0 |
| GAGTCCGCCAGCACCAACCAGACATCTATGTACCTCTGTGCCAGCAGT<br>TTGGGACAGTTGAGCAATCAGCCCCAGCATTTTGGTGAT | 0.0 | 0.0 | 5.483  | 0.0 |
| GAGTCCGCCAGCACCAACCAGACATCTATGTACCTCTGTGCCAGCAGT<br>TTAGGGCAGCTTAGCAATCAGCCCCAGCATTTTGGTGAT | 0.0 | 0.0 | 24.673 | 0.0 |
| CTGACAGTGACCAAGTGCCATCCTGAAGACAGCAGCTTCTACATCTGC<br>AGTGTTCAAGGGGATAATTCACCCCTCCACTTTGGGAAC | 0.0 | 0.0 | 21.932 | 0.0 |
| CTGACAGTGACCAAGTGCCATCCTGAAGACAGCAGCTTCTACATCTGC<br>AGTGCTGGCGGAGGGGGCCAGCCCCAGCATTTTGGTGAT | 0.0 | 0.0 | 13.707 | 0.0 |
| CTGACAGTGACCAAGTGCCATCCTGAAGACAGCAGCTTCTACATCTGC<br>AGTGCAACGACGGACGACACTGAAGCTTCTTTGGACAA  | 0.0 | 0.0 | 32.897 | 0.0 |
| CTCAAGATCCAGCCTGCAAAGCTTGAGGACTCGGCCGTGTATCTCTGT<br>GCCAGCAGCCCGGGATTTATGGCTACACCTTCGGTTTCG | 0.0 | 0.0 | 5.483  | 0.0 |
| CTCAAGATCCAGCCTGCAAAGCTTGAGGACTCGGCCGTGTATCTCTGT<br>GCCAGCAGCCCGGAATATATGGCTACACCTTCGGTTTCG | 0.0 | 0.0 | 19.190 | 0.0 |
| CTAGAGTCTGCCATCCCCAACCCAGACAGCTTTACTTCTGTGCCACCA<br>GTGATTTGAGTACTGCCGATGGCTACACCTTCGGTTTCG | 0.0 | 0.0 | 30.156 | 0.0 |
| CTAGAGTCTGCCATCCCCAACCCAGACAGCTTTACTTCTGTGCCACCA<br>GCCGGACAGACCTCACCGGGGAGCTGTTTTTGGAGAA   | 0.0 | 0.0 | 38.380 | 0.0 |
| CCCAGCCCCAACCCAGACCTCTGTACTTCTGTGCCAGCAGTTTATGGT<br>TCCCAGGGGCGAGCAATCAGCCCCAGCATTTTGGTGAT  | 0.0 | 0.0 | 2.741  | 0.0 |
| CATCTGAAGACAGCAGCTTCTACATCTGCAGTGCTAGTATCGGGACA<br>GGAAGCTATTATAGCAATCAGCCCCAGCATTTTGGTGAT  | 0.0 | 0.0 | 27.415 | 0.0 |
| CAGCGCACAGAGCGGGGGACTCAGCCGTGTATCTGTGCCAGCAG<br>CACCCAAAACCTCTGGGGCCAACGTCCTGACTTTCGGGGCC   | 0.0 | 0.0 | 71.278 | 0.0 |
| CAGCCTGCAGAACTGGAGGATTCTGGAGTTTATTTCTGTGCCAGCAGC<br>CGGGGTACAGGGACGGCCGGGGAGCTGTTTTTGGAGAA  | 0.0 | 0.0 | 16.449 | 0.0 |
| ATCCAGCGCACAGAGCAGGGGGACTCGGCCATGTATCTCTGTGCCAG                                             | 0.0 | 0.0 | 10.966 | 0.0 |

|                                                                                             |     |     |         |     |
|---------------------------------------------------------------------------------------------|-----|-----|---------|-----|
| CAGCTTCGAGACAGAAGGACAGCCCCAGCATTTTGGTGAT                                                    |     |     |         |     |
| ATCCAGCTGCAGAGCTTGGGGACTCGGCCGTGTATCTCTGTGCCAG<br>CAGCTTGACAGCAGGTGACACTGAAGCTTTCTTTGGACAA  | 0.0 | 0.0 | 126.107 | 0.0 |
| AGTGCCCATCCTGAAGACAGCAGCTTCTACATCTGCAGTGCTCAAGGA<br>GATGAAGACAGGGGCCGGGATGGCTACACCTTCGGTTCG | 0.0 | 0.0 | 41.122  | 0.0 |
| AGTGCCCATCCTGAAGACAGCAGCTTCTACATCTGCAGTGCTAGAAA<br>GGGGCGGGGACAGGGGGATATGGCTACACCTTCGGTTCG  | 0.0 | 0.0 | 104.175 | 0.0 |
| ACTCTGACAGTGACCACTGCCATCCTGAAGACAGCAGCTTCTACATC<br>TGCACTGGGGGTTACCCCTCCACTTTGGGAAC         | 0.0 | 0.0 | 2.741   | 0.0 |
| ACCTTGGAGCTGGGGGACTCGGCCCTTATCTTTGCGCCAGCAGCGCC<br>CACGGAGAACAATCCTACAATGAGCAGTTCTTCGGGCCA  | 0.0 | 0.0 | 46.605  | 0.0 |
| ACCCTGCAGCCAGAAGACTCGGCCCTGTATCTCTGCGCCAGCAGCCA<br>AAATCCGGGAGCGAACACCGGGGAGCTGTTTTTGGAGAA  | 0.0 | 0.0 | 21.932  | 0.0 |
| ACCACTGCCATCCTGAAGACAGCAGCTTCTACATCTGCAGTGCTGGG<br>TACGGGGGCGAGGGGAATTCACCCCTCCACTTTGGGAAC  | 0.0 | 0.0 | 79.502  | 0.0 |
| ACCACTGCCATCCTGAAGACAGCAGCTTCTACATCTGCAGTGCTCTG<br>TTAGCAGGGCTTACCTACAATGAGCAGTTCTTCGGGCCA  | 0.0 | 0.0 | 10.966  | 0.0 |
| ACATCGGCCAAAAGAACCCGACAGCTTTCTATCTCTGTGCCAGTAGT<br>ATGAGGTCCGGAGGTCAAGAGACCCAGTACTTCGGGCCA  | 0.0 | 0.0 | 123.365 | 0.0 |
| ACATCGGCCAAAAGAACCCGACAGCTTTCTATCTCTGTGCCAGTAGT<br>ACTAGCGGGAGGGCGCACTACGAGCAGTACTTCGGGCCG  | 0.0 | 0.0 | 208.350 | 0.0 |
| ACATCGGCCAAAAGAACCCGACAGCTTTCTATCTCTGTGCCAGTAGT<br>ACTAGCGGGACACCGACCTACGAGCAGTACTTCGGGCCG  | 0.0 | 0.0 | 32.897  | 0.0 |
| ACATCGGCCAAAAGAACCCGACAGCTTTCTATCTCTGTGCCAGTAGT<br>ACCTCCGGGACTCCAATCTACGAGCAGTACTTCGGGCCG  | 0.0 | 0.0 | 30.156  | 0.0 |
| ACATCGGCCAAAAGAACCCGACAGCTTTCTATCTCTGTGCCAGTAGT<br>ACCTCCGGGACTACTCACTACGAGCAGTACTTCGGGCCG  | 0.0 | 0.0 | 13.707  | 0.0 |
| ACATCGGCCAAAAGAACCCGACAGCTTTCTATCTCTGTGCCAGTAGT<br>ACCTCCGGGACTCCCACTACGAGCAGTACTTCGGGCCG   | 0.0 | 0.0 | 24.673  | 0.0 |
| ACATCGGCCAAAAGAACCCGACAGCTTTCTATCTCTGTGCCAGTAGT<br>ACAGCAGGCAAGGCTCATTACGAGCAGTACTTCGGGCCG  | 0.0 | 0.0 | 13.707  | 0.0 |
| ACAGTGACCACTGCCATCCTGAAGACAGCAGCTTCTACATCTGCAGT<br>GCTCAAAGCGGGGGGAGCTATGGCTACACCTTCGGTTCG  | 0.0 | 0.0 | 60.312  | 0.0 |
| ACAGTGACCACTGCCATCCTGAAGACAGCAGCTTCTACATCTGCAGT                                             | 0.0 | 0.0 | 46.605  | 0.0 |

|  |                                                  |     |     |        |     |
|--|--------------------------------------------------|-----|-----|--------|-----|
|  | GCTCAAACAGGGGGCAGCTATGGCTACACCTTCGGTTCG          |     |     |        |     |
|  | AATGTGAGCACCTTGGAGCTGGGGGACTCGGCCCTTTATCTTTGCGCC | 0.0 | 0.0 | 32.897 | 0.0 |
|  | AGCAGCTTGGACAGGGTGGGTGAAGCTTCTTTGGACAA           |     |     |        |     |

- No evaluable tumor samples.
