# Supplementary material for: Intratumoral IFN-γ or topical TLR7 agonist promotes infiltration of melanoma metastases by T lymphocytes expanded in the blood after cancer vaccine
Source: PubMed Central journal article supplement — J Immunother Cancer. 2023 Feb 6;11(2):e005952. doi: 10.1136/jitc-2022-005952 (PMC9906378; doi:10.1136/jitc-2022-005952), 2023-02-06
Supplement: jitc-2022-005952supp008.pdf [file jitc-2022-005952supp008.pdf]

**Supplemental Table 8 – Total number of productive rearrangements, total productive templates, productive Simpson clonality, fraction of T cells of all nucleated cells, fraction of viTILs of all T cells, fraction of viTILs of all nucleated cells, in tumor**

| Clinical Trial | Patient | Day of Tumor Sample | Total Productive Rearrangements | Total Productive Templates | Productive Simpson Clonality | Fraction of T Cells of Nucleated Cells | Fraction of viTILs of T Cells | Fraction of viTILs of Nucleated Cells |
|----------------|---------|---------------------|---------------------------------|----------------------------|------------------------------|----------------------------------------|-------------------------------|---------------------------------------|
| Mel51          | 1       | 1                   | 24                              | 29                         | 0.2208                       | -                                      | 0.0                           | -                                     |
|                |         | 22                  | 7                               | 7                          | 0.3780                       | -                                      | 0.0                           | -                                     |
|                |         | 24                  | 20,556                          | 170,735                    | 0.0865                       | 0.2996                                 | 0.02270                       | 0.00485                               |
|                | 2       | 1                   | 384                             | 436                        | 0.0547                       | 0.0059                                 | 0.0                           | 0.0                                   |
|                |         | 22                  | 383                             | 423                        | 0.0547                       | 0.0037                                 | 0.01182                       | 0.01992                               |
|                |         | 24 (-IFN $\gamma$ ) | 1,297                           | 1,712                      | 0.0371                       | 0.0025                                 | 0.00818                       | 0.00186                               |
|                |         | 24 (+IFN $\gamma$ ) | 5,886                           | 8,482                      | 0.0248                       | 0.0417                                 | 0.01332                       | 0.00996                               |
|                | 3       | 1                   | 311                             | 759                        | 0.2115                       | 0.1571                                 | 0.0                           | 0.0                                   |
|                |         | 22                  | 1,360                           | 5,191                      | 0.1893                       | 0.2687                                 | 0.00655                       | 0.04122                               |
|                |         | 24                  | 3,171                           | 26,492                     | 0.2637                       | 0.4284                                 | 0.00634                       | 0.01202                               |
|                | 4       | 1                   | 26                              | 27                         | 0.1995                       | 0.0215                                 | 0.0                           | 0.0                                   |
|                |         | 22                  | 113                             | 140                        | 0.1045                       | 0.0054                                 | 0.02857                       | 0.21517                               |
| 24             |         | 54                  | 57                              | 0.1393                     | 0.0067                       | 0.08772                                | -                             |                                       |
| Mel53          | 5       | 1                   | 23                              | 24                         | 0.2125                       | 0.0058                                 | 0.0                           | 0.0                                   |
|                |         | 22                  | 1,736                           | 4,078                      | 0.1898                       | 0.5780                                 | 0.00172                       | 0.03434                               |
|                |         | 43                  | 2,860                           | 16,138                     | 0.1742                       | 0.4989                                 | 0.00149                       | 0.00602                               |
|                | 6       | 1                   | 1,305                           | 1,722                      | 0.0431                       | 0.0789                                 | 0.0                           | 0.0                                   |
|                |         | 22 (-Imiquimod)     | 13                              | 14                         | 0.2857                       | -                                      | 0.0                           | 0.0                                   |
|                |         | 22 (+Imiquimod)     | 12,745                          | 36,477                     | 0.1060                       | 0.3165                                 | 0.03145                       | 0.03595                               |
|                |         | 43                  | 856                             | 1,268                      | 0.0755                       | 0.5608                                 | 0.01420                       | -                                     |

- Not evaluable.
